# Supplementary material for: Genomic analysis of endemic clones of toxigenic and non-toxigenic Corynebacterium diphtheriae in Belarus during and after the major epidemic in 1990s
Source: PubMed Central journal article supplement (PMC5683216; doi:10.1186/s12864-017-4276-3), 2017-11-13
Supplement: 12864_2017_4276_MOESM2_ESM.pdf [file 12864_2017_4276_MOESM2_ESM.pdf]

**Additional File 2: Table S2.** Number and toxigenicity of isolates collected between 1996 – 2014 in Belarus and those selected for genomic analyses in this study

| Year | Total isolates  |          |          | Selected for this study |          |          |
|------|-----------------|----------|----------|-------------------------|----------|----------|
|      | No. of isolates | tox+ (%) | tox- (%) | No. of isolates         | tox+ (%) | tox- (%) |
| 1996 | 486             | 47.12    | 52.88    | 6                       | 50.00    | 50.00    |
| 1997 | 410             | 36.34    | 63.66    | 8                       | 50.00    | 50.00    |
| 1998 | 362             | 19.61    | 80.39    | 8                       | 37.50    | 62.50    |
| 1999 | 339             | 30.68    | 69.32    | 6                       | 66.67    | 33.33    |
| 2000 | 403             | 29.78    | 70.22    | 3                       | 33.33    | 66.67    |
| 2001 | 408             | 13.48    | 86.52    | 5                       | 40.00    | 60.00    |
| 2002 | 310             | 8.06     | 91.94    | 5                       | 20.00    | 80.00    |
| 2003 | 213             | 7.51     | 92.49    | 3                       | 66.67    | 33.33    |
| 2004 | 290             | 19.31    | 80.69    | 8                       | 37.50    | 62.50    |
| 2005 | 323             | 6.19     | 93.81    | 3                       | 66.67    | 33.33    |
| 2006 | 201             | 3.48     | 96.52    | 9                       | 55.56    | 44.44    |
| 2007 | 204             | 2.94     | 97.06    | 7                       | 42.86    | 57.14    |
| 2008 | 158             | 5.70     | 94.30    | 5                       | 40.00    | 60.00    |
| 2009 | 98              | 3.06     | 96.94    | 3                       | 33.33    | 66.67    |
| 2010 | 77              | 5.19     | 94.81    | 4                       | 50.00    | 50.00    |
| 2011 | 54              | 0.00     | 100.00   | 3                       | 0.00     | 100.00   |
| 2012 | 21              | 0.00     | 100.00   | 2                       | 0.00     | 100.00   |
| 2013 | 10              | 0.00     | 100.00   | 2                       | 0.00     | 100.00   |
| 2014 | 15              | 0.00     | 100.00   | 2                       | 0.00     | 100.00   |

**Additional File 2: Table S3.** Distribution of isolates from epidemic ( $\leq$  year 2000) and post-epidemic period ( $\geq$  year 2001) in major groups. All minor groups are pooled together for statistical analysis.

| Sampling period      | Groups |     |       | Total |
|----------------------|--------|-----|-------|-------|
|                      | ST5    | ST8 | Other |       |
| Epidemic period      | 10     | 13  | 9     | 32    |
| Post-epidemic period | 27     | 21  | 13    | 61    |
| Total                | 37     | 34  | 22    | 93    |

**Chi square statistics on above distribution:**

|                     | Value              | df | Asymptotic<br>Significance<br>(2-sided) | Monte Carlo Sig. (2-sided) |                            |                |
|---------------------|--------------------|----|-----------------------------------------|----------------------------|----------------------------|----------------|
|                     |                    |    |                                         | Significance               | 99% Confidence<br>Interval |                |
|                     |                    |    |                                         |                            | Lower<br>Bound             | Upper<br>Bound |
| Pearson Chi-Square  | 1.526 <sup>a</sup> | 2  | 0.466                                   | .533 <sup>b</sup>          | 0.52                       | 0.546          |
| Likelihood Ratio    | 1.548              | 2  | 0.461                                   | .533 <sup>b</sup>          | 0.52                       | 0.546          |
| Fisher's Exact Test | 1.579              |    |                                         | .533 <sup>b</sup>          | 0.52                       | 0.546          |
| N of Valid Cases    | 93                 |    |                                         |                            |                            |                |

- a. 0 cells (0.0%) have expected count less than 5. The minimum expected count is 5.20.
- b. b. Based on 10000 sampled tables with starting seed 1314643744.

**Additional File 2: Table S4.** Distribution of isolates from asymptomatic carriage, diphtheria and sore throat patients in major groups. All minor groups are pooled together for statistical analysis.

| Groups | Clinical information |            |             | Total |
|--------|----------------------|------------|-------------|-------|
|        | Asymptomatic         | Diphtheria | sore throat |       |
| ST5    | 7                    | 1          | 29          | 37    |
| ST8    | 10                   | 18         | 6           | 34    |
| Other  | 5                    | 7          | 10          | 22    |
| Total  | 22                   | 26         | 45          | 93    |

**Chi square statistics on above distribution:**

|                     | Value               | df | Asymptotic<br>Significance<br>(2-sided) | Monte Carlo Sig. (2-sided) |                            |                |
|---------------------|---------------------|----|-----------------------------------------|----------------------------|----------------------------|----------------|
|                     |                     |    |                                         | Significance               | 99% Confidence<br>Interval |                |
|                     |                     |    |                                         |                            | Lower<br>Bound             | Upper<br>Bound |
| Pearson Chi-Square  | 30.542 <sup>a</sup> | 4  | 0                                       | .000 <sup>b</sup>          | 0.000                      | 0.000          |
| Likelihood Ratio    | 35.572              | 4  | 0                                       | .000 <sup>b</sup>          | 0.000                      | 0.000          |
| Fisher's Exact Test | 33.655              |    |                                         | .000 <sup>b</sup>          | 0.000                      | 0.000          |
| N of Valid Cases    | 93                  |    |                                         |                            |                            |                |

a. 0 cells (0.0%) have expected count less than 5. The minimum expected count is 5.20.

b. Based on 10000 sampled tables with starting seed 299883525.

**Additional File 2: Table S5.** Allelic variation in the direct repeat and spacer sequences among the CRISPR loci of ST8 and ST5 isolates

| Strain | Year | Biovar | Clinical information | Country | DRA type | DRA locus                             | DRB type | DRB locus                                                                                                            |
|--------|------|--------|----------------------|---------|----------|---------------------------------------|----------|----------------------------------------------------------------------------------------------------------------------|
| 1480   | 1999 | Gravis | Diphtheria           | Gomel   | CT2-1    | D1-S111-S108                          | CT1E-12  | D4-S97-S7-S65-S82-S8-S17-S58-S106-S54-S19-S62-S86-S42-S98-S46-S70-S64-S66-S91                                        |
| 4905   | 2008 | Gravis | Sore throat          | Mogilev | CT2-2    | D1-S112-S27-S80-S103-S41-S111-S107    | CT1E-1   | D4-S97-S17-S58-S106-S54-S28-S2-S85-S71-S28-S2-S86-S85-S71-S61-S42-S98-S46-S70-S64-S5-S8                              |
| 2637   | 2002 | Gravis | Asymptomatic         | Minsk   | CT2-3    | D1-S13-S27-S80-S103-S41-S111-S107     | CT1E-20  | D5-S95-S53-S57-S32-S39-S83-S48-S72-S14-S115-S78-S20-S74-S90-S94-S26-S18-S81-S24-S29-S43-S38                          |
| 4601   | 2007 | Gravis | Asymptomatic         | Vitebsk | CT2-4    | D1-S27-S80-S103-S41-S111-S107         | CT1E-4   | D4-S97-S65-S5-S8-S17-S58-S106-S54-S19-S28-S42-S98-S46-S70-S64-S66-S91-S7                                             |
| 300    | 1996 | Gravis | Diphtheria           | Mogilev | CT2-4    | D1-S27-S80-S103-S41-S111-S107         | CT1E-6   | D4-S97-S7-S65-S82-S51-S36-S5-S8-S17-S58-S106-S86-S54-S19-S28-S2-S71-S28-S2-S85-S71-S61-S42-S98-S46-S70-S64-S66-S91   |
| 1270   | 1998 | Gravis | Diphtheria           | Gomel   | CT2-4    | D1-S27-S80-S103-S41-S111-S107         | CT1E-6   | D4-S97-S7-S65-S82-S51-S36-S5-S8-S17-S58-S106-S86-S54-S19-S28-S2-S71-S28-S2-S85-S71-S61-S42-S98-S46-S70-S64-S66-S91   |
| 1457   | 1999 | Gravis | Diphtheria           | Minsk   | CT2-4    | D1-S27-S80-S103-S41-S111-S107         | CT1E-6   | D4-S97-S7-S65-S82-S51-S36-S5-S8-S17-S58-S106-S86-S54-S19-S28-S2-S71-S28-S2-S85-S71-S61-S42-S98-S46-S70-S64-S66-S91   |
| 1854   | 2000 | Gravis | Asymptomatic         | Minsk   | CT2-4    | D1-S27-S80-S103-S41-S111-S107         | CT1E-6   | D4-S97-S7-S65-S82-S51-S36-S5-S8-S17-S58-S106-S86-S54-S19-S28-S2-S71-S28-S2-S85-S71-S61-S42-S98-S46-S70-S64-S66-S91   |
| 4031   | 2005 | Gravis | Diphtheria           | Vitebsk | CT2-4    | D1-S27-S80-S103-S41-S111-S107         | CT1E-7   | D4-S97-S7-S65-S82-S51-S36-S5-S8-S17-S58-S106-S86-S54-S19-S28-S2-S85-S71-S61-S42-S98-S46-S70-S64-S66-S91              |
| 822    | 1997 | Gravis | Diphtheria           | Minsk   | CT2-4    | D1-S27-S80-S103-S41-S111-S107         | CT1E-9   | D4-S97-S7-S65-S82-S51-S36-S5-S8-S17-S58-S86-S42-S98-S46-S70-S64-S66-S91                                              |
| 2173   | 2001 | Gravis | Diphtheria           | Mogilev | CT2-4    | D1-S27-S80-S103-S41-S111-S107         | CT1E-10  | D4-S97-S7-S65-S82-S8-S17-S58-S106-S54-S19-S28-S86-S2-S85-S71-S28-S2-S85-S71-S61-S42-S98-S46-S70-S64-S66-S91          |
| 3058   | 2004 | Gravis | Asymptomatic         | Grodno  | CT2-4    | D1-S27-S80-S103-S41-S111-S107         | CT1E-11  | D4-S97-S7-S65-S82-S8-S17-S58-S106-S54-S19-S28-S86-S2-S85-S71-S61-S42-S98-S46-S70-S64-S66-S91                         |
| 72     | 1996 | Gravis | Diphtheria           | Mogilev | CT2-4    | D1-S27-S80-S103-S41-S111-S107         | CT1E-14  | D5-S26-S48-S72-S14-S115-S78-S74-S90-S94-S18-S81-S24-S29-S57-S32-S39-S83                                              |
| 1052   | 1998 | Gravis | Diphtheria           | Gomel   | CT2-4    | D1-S27-S80-S103-S41-S111-S107         | CT1E-20  | D5-S95-S53-S57-S32-S39-S83-S48-S72-S14-S115-S78-S20-S74-S90-S94-S26-S18-S81-S24-S29-S43-S38                          |
| 2792   | 2003 | Gravis | Asymptomatic         | Mogilev | CT2-5    | D1-S27-S80-S41-S111-S107              | CT1E-19  | D5-S60-S26-S18-S81-S24-S29-S43-S38-S53-S57-S32-S12-S39-S83-S48-S72-S14-S115-S78-S74-S90-S94-S6-S9-S95-S12-S9-S95-S20 |
| 4014   | 2005 | Gravis | Asymptomatic         | Minsk   | CT2-6    | D1-S34-S37-S27-S80-S103-S41-S111-S107 | CT1E-6   | D4-S97-S7-S65-S82-S51-S36-S5-S8-S17-S58-S106-S86-S54-S19-S28-S2-S71-S28-S2-S85-S71-S61-S42-S98-S46-S70-S64-S66-S91   |
| 4938   | 2009 | Gravis | Diphtheria           | Minsk   | CT2-6    | D1-S34-S37-S27-S80-S103-S41-S111-S107 | CT1E-6   | D4-S97-S7-S65-S82-S51-S36-S5-S8-S17-S58-S106-S86-S54-S19-S28-S2-S71-S28-S2-S85-S71-S61-S42-S98-S46-S70-S64-S66-S91   |
| 4728   | 2007 | Gravis | Asymptomatic         | Minsk   | CT2-7    | D1-S37-S27-S80-S103-S41-S111-S107     | CT1E-6   | D4-S97-S7-S65-S82-S51-S36-S5-S8-S17-S58-S106-S86-S54-S19-S28-S2-S71-S28-S2-S85-S71-S61-S42-S98-S46-S70-S64-S66-S91   |
| 5073   | 2010 | Gravis | Diphtheria           | Minsk   | CT2-7    | D1-S37-S27-S80-S103-S41-S111-S107     | CT1E-18  | D5-S60-S26-S18-S53-S57-S32-S39-S83-S48-S72-S14-S12-S115-S78-S74-S90-S94-S6-S9-S95-S12-S9-S95-S20                     |
| 5052   | 2010 | Gravis | Asymptomatic         | Minsk   | CT2-7    | D1-S37-S27-S80-S103-S41-S111-S107     | CT1E-6   | D4-S97-S7-S65-S82-S51-S36-S5-S8-S17-S58-S106-S86-S54-S19-S28-S2-S71-S28-S2-S85-S71-S61-S42-S98-S46-S70-S64-S66-S91   |

Additional File 2: Table S5 continues...

| Strain     | Year | Biovar   | Clinical information | Country | DRA type | DRA locus                                  | DRB type | DRB locus                                                                                                            |
|------------|------|----------|----------------------|---------|----------|--------------------------------------------|----------|----------------------------------------------------------------------------------------------------------------------|
| 4800       | 2008 | Gravis   | Diphtheria           | Minsk   | CT2-7    | D1-S37-S27-S80-S103-S41-S111-S107          | CT1E-20  | D5-S95-S53-S57-S32-S39-S83-S48-S72-S14-S115-S78-S20-S74-S90-S94-S26-S18-S81-S24-S29-S43-S38                          |
| 1072       | 1998 | Gravis   | Diphtheria           | Minsk   | CT2-8    | D1-S44-S27-S80-S103-S41-S111-S107          | CT1E-13  | D4-S97-S7-S65-S82-S8-S17-S58-S106-S54-S19-S86-S42-S98-S46-S70-S64-S66-S91                                            |
| NCTC 13129 | 1997 | Gravis   | Diphtheria           | UK      | CT2-9    | D1-S89-S27-S80-S103-S41-S111-S107          | CT1E-5   | D4-S97-S65-S82-S8-S17-S58-S106-S54-S19-S28-S2-S86-S85-S71-S28-S2-S85-S71-S61-S42-S98-S46-S70-S91-S91-S7              |
| 933a       | 1997 | Gravis   | Sore throat          | Minsk   | CT2-10   | D1-S45-S113-S110                           | CT1E-19  | D5-S60-S26-S18-S81-S24-S29-S43-S38-S53-S57-S32-S12-S39-S83-S48-S72-S14-S115-S78-S74-S90-S94-S6-S9-S95-S12-S9-S95-S20 |
| 2789       | 2003 | Gravis   | Sore throat          | Grodno  | CT2-11   | D3-S33-S3-S21-S63-S92-S55                  | CT1E-10  | D4-S97-S7-S65-S82-S8-S17-S58-S106-S54-S19-S28-S86-S2-S85-S71-S28-S2-S85-S71-S61-S42-S98-S46-S70-S64-S66-S91          |
| 4299       | 2006 | Gravis   | Diphtheria           | Vitebsk | CT2-11   | D3-S33-S3-S21-S63-S92-S55                  | CT1E-16  | D5-S60-S24-S29-S43-S38-S53-S57-S32-S39-S83-S48-S12-S72-S14-S115-S78-S74-S90-S94-S6-S9-S95-S20-S26-S18-S81            |
| 2225       | 2001 | Gravis   | Diphtheria           | Brest   | CT2-11   | D3-S33-S3-S21-S63-S92-S55                  | CT1E-17  | D5-S60-S24-S29-S43-S38-S53-S57-S32-S39-S83-S48-S95-S72-S14-S115-S94-S12-S9-S95-S20-S26-S18-S81                       |
| 4525       | 2006 | Gravis   | Diphtheria           | Minsk   | CT2-12   | D3-S33-S3-S21-S63-S92-S55-S114             | CT1E-7   | D4-S97-S7-S65-S82-S51-S36-S5-S8-S17-S58-S106-S86-S54-S19-S28-S2-S85-S71-S61-S42-S98-S46-S70-S64-S66-S91              |
| 4720       | 2007 | Gravis   | Diphtheria           | Minsk   | CT2-12   | D3-S33-S3-S21-S63-S92-S55-S114             | CT1E-8   | D4-S97-S7-S65-S82-S51-S36-S5-S8-S17-S58-S106-S86-S54-S19-S28-S42-S98-S46-S70-S64-S66-S91                             |
| 2278a      | 2001 | Gravis   | Sore throat          | Minsk   | CT2-13   | D3-S33-S3-S21-S63-S92-S55-S35-S30          | CT1E-2   | D4-S97-S19-S28-S86-S42-S98-S91-S17-S58-S106-S54                                                                      |
| 1006       | 1998 | Gravis   | Sore throat          | Minsk   | CT2-13   | D3-S33-S3-S21-S63-S92-S55-S35-S30          | CT1E-15  | D5-S60-S18-S81-S24-S29-S43-S38-S53-S57-S32-S39-S12-S83-S78-S74-S90-S94-S6-S12-S6-S9-S95-S20-S26                      |
| 700a       | 1997 | Gravis   | Diphtheria           | Minsk   | CT2-14   | D3-S33-S3-S21-S63-S92-S55-S68              | CT1E-10  | D4-S97-S7-S65-S82-S8-S17-S58-S106-S54-S19-S28-S86-S2-S85-S71-S28-S2-S85-S71-S61-S42-S98-S46-S70-S64-S66-S91          |
| 2803       | 2004 | Gravis   | Asymptomatic         | Minsk   | CT2-15   | D3-S33-S3-S21-S63-S92-S92-S55-S10          | CT1E-3   | D4-S97-S5-S8-S17-S58-S106-S54-S19-S28-S2-S85-S86-S71-S28-S2-S85-S71-S61-S42-S98-S46-S70-S64-S66-S36                  |
| 2393       | 2002 | Gravis   | Sore throat          | Minsk   | CT2-16   | D3-S33-S3-S92-S55-S52-S50                  | CT1E-15  | D5-S60-S18-S81-S24-S29-S43-S38-S53-S57-S32-S39-S12-S83-S78-S74-S90-S94-S6-S12-S6-S9-S95-S20-S26                      |
| 1438       | 1999 | Mitis    | Asymptomatic         | Grodno  | -        | -                                          | CT1E-19  | D5-S60-S26-S18-S81-S24-S29-S43-S38-S53-S57-S32-S12-S39-S83-S48-S72-S14-S115-S78-S74-S90-S94-S6-S9-S95-S12-S9-S95-S20 |
| 4502       | 2006 | Gravis   | Asymptomatic         | Gomel   | CT2-17   | D2-S116-S25-S77-S31-S16-S93-S93-S16        |          |                                                                                                                      |
| 209        | 1996 | Gravis   | Asymptomatic         | Minsk   | CT2-18   | D2-S40-S67-S49-S15-S16                     |          |                                                                                                                      |
| 2379       | 2002 | Belfanti | Sore throat          | Mogilev | CT2-19   | D2-S75-S15-S101                            |          |                                                                                                                      |
| 4499       | 2006 | Belfanti | Sore throat          | Gomel   | CT2-20   | D2-S75-S40-S101-S15-S101                   |          |                                                                                                                      |
| 5171       | 2012 | Mitis    | Sore throat          | Minsk   | CT2-21   | D2-S75-S40-S16                             |          |                                                                                                                      |
| 1137       | 1998 | Belfanti | Sore throat          | Minsk   | CT2-22   | D2-S75-S40-S16-S15-S101                    |          |                                                                                                                      |
| 1556       | 1999 | Belfanti | Sore throat          | Minsk   | CT2-22   | D2-S75-S40-S16-S15-S101                    |          |                                                                                                                      |
| 1734       | 2000 | Belfanti | Sore throat          | Mogilev | CT2-22   | D2-S75-S40-S16-S15-S101                    |          |                                                                                                                      |
| 4069       | 2005 | Belfanti | Asymptomatic         | Vitebsk | CT2-22   | D2-S75-S40-S16-S15-S101                    |          |                                                                                                                      |
| 5162       | 2012 | Gravis   | Sore throat          | Brest   | CT2-23   | D2-S75-S76-S67-S79-S49-S15-S16-S16-S22-S22 |          |                                                                                                                      |
| 5191       | 2013 | Gravis   | Sore throat          | Minsk   | CT2-24   | D2-S79-S116-S11-S16                        |          |                                                                                                                      |

Additional File 2: Table S5 continues...

| Strain   | Year | Biovar   | Clinical information    | Country | DRA type | DRA locus                                  | DRB type | DRB locus |
|----------|------|----------|-------------------------|---------|----------|--------------------------------------------|----------|-----------|
| 728      | 1997 | Mitis    | Sore throat             | Minsk   | CT2-25   | D6-S100-S1-S117-S87-S4                     |          |           |
| 1054     | 1998 | Gravis   | Asymptomatic            | Gomel   | CT2-26   | D6-S117-S102-S59-S88-S87-S4                |          |           |
| 768a     | 1997 | Gravis   | Sore throat             | Brest   | CT2-27   | D6-S117-S1-S88-S87-S4                      |          |           |
| 2399     | 2002 | Gravis   | Sore throat             | Minsk   | CT2-28   | D6-S117-S84-S104                           |          |           |
| 4727     | 2007 | Gravis   | Sore throat             | Minsk   | CT2-28   | D6-S117-S84-S104                           |          |           |
| 4994     | 2009 | Gravis   | Sore throat             | Brest   | CT2-28   | D6-S117-S84-S104                           |          |           |
| 2163     | 2001 | Gravis   | Asymptomatic            | Minsk   | CT2-28   | D6-S117-S84-S104                           |          |           |
| 2650     | 2002 | Mitis    | Sore throat             | Minsk   | CT2-29   | D6-S117-S87-S4-S104                        |          |           |
| 2926     | 2004 | Gravis   | Asymptomatic            | Gomel   | CT2-30   | D6-S23-S109-S56-S88-S87-S4                 |          |           |
| 74       | 1996 | Mitis    | Asymptomatic            | Mogilev | CT2-31   | D6-S47-S1-S117-S87-S4                      |          |           |
| 631      | 1997 | Belfanti | Sore throat             | Vitebsk | CT2-31   | D6-S47-S1-S117-S87-S4                      |          |           |
| 5130     | 2011 | Belfanti | Sore throat             | Vitebsk | CT2-31   | D6-S47-S1-S117-S87-S4                      |          |           |
| 4766     | 2008 | Belfanti | Sore throat             | Gomel   | CT2-32   | D6-S47-S1-S47-S87-S4                       |          |           |
| 5201     | 2014 | Mitis    | Sore throat             | Minsk   | CT2-33   | D6-S47-S1-S87-S4                           |          |           |
| 4663     | 2007 | Belfanti | Sore throat             | Gomel   | CT2-34   | D6-S47-S87-S4-S105                         |          |           |
| 987      | 1998 | Mitis    | Sore throat             | Gomel   | CT2-35   | D6-S4-S104                                 |          |           |
| 2370     | 2001 | Mitis    | Sore throat             | Minsk   | CT2-35   | D6-S4-S104                                 |          |           |
| 2686     | 2003 | Mitis    | Sore throat             | Minsk   | CT2-35   | D6-S4-S104                                 |          |           |
| 2915     | 2004 | Mitis    | Sore throat             | Vitebsk | CT2-35   | D6-S4-S104                                 |          |           |
| 4288     | 2006 | Mitis    | Diphtheria              | Minsk   | CT2-35   | D6-S4-S104                                 |          |           |
| 4552     | 2006 | Mitis    | Sore throat             | Vitebsk | CT2-35   | D6-S4-S104                                 |          |           |
| 4726     | 2007 | Mitis    | Sore throat             | Minsk   | CT2-35   | D6-S4-S104                                 |          |           |
| 4774     | 2008 | Mitis    | Sore throat             | Minsk   | CT2-35   | D6-S4-S104                                 |          |           |
| 5005     | 2009 | Mitis    | Sore throat             | Gomel   | CT2-35   | D6-S4-S104                                 |          |           |
| 5085     | 2010 | Mitis    | Sore throat             | Mogilev | CT2-35   | D6-S4-S104                                 |          |           |
| 5138     | 2011 | Gravis   | Sore throat             | Brest   | CT2-36   | D6-S69-S4-S73-S73-S117-S117-S1-S96-S56-S88 |          |           |
| ISS 4060 | 1999 | Gravis   | Pharyngitis/tonsillitis | Italy   | CT2-37   | D6-S99-S117-S1-S109-S56-S88-S87-S87-S4     |          |           |

Note: Direct-repeat and spacer sequences from CRISPR loci were extracted using CRISPRFinder [1]. All direct-repeat sequences and spacer sequences were separately aligned using T-Coffee [2] at the Ressource Parisienne en BioInformatique Structurale server (<http://mobyle.rpbs.univ-paris-diderot.fr/>). ML trees were calculated from the alignment of direct-repeat sequences with JC substitution model and from the alignment of spacer sequences with HKY model, each with 100,000 SH-like approximate likelihood ratio tests (SH-aLRT) and 100,000 ultrafast bootstrap iterations using IQ-Tree [3]. An allele number was assigned to each group of direct-repeats and spacers in the phylogenetic tree with a phylogenetic distance of zero.

#### References

1. Grissa I, Vergnaud G, Pourcel C: **CRISPRFinder: a web tool to identify clustered regularly interspaced short palindromic repeats**. *Nucleic Acids Res* 2007, **35**(Web Server issue):W52-57.
2. Notredame C, Higgins DG, Heringa J: **T-Coffee: A novel method for fast and accurate multiple sequence alignment**. *J Mol Biol* 2000, **302**(1):205-217.
3. Nguyen LT, Schmidt HA, von Haeseler A, Minh BQ: **IQ-TREE: a fast and effective stochastic algorithm for estimating maximum-likelihood phylogenies**. *Mol Biol Evol* 2015, **32**(1):268-274.
