# Supplementary material for: Genomic analysis of endemic clones of toxigenic and non-toxigenic Corynebacterium diphtheriae in Belarus during and after the major epidemic in 1990s
Source: PubMed Central journal article supplement (PMC5683216; doi:10.1186/s12864-017-4276-3), 2017-11-13
Supplement: 12864_2017_4276_MOESM3_ESM.pdf [file 12864_2017_4276_MOESM3_ESM.pdf]

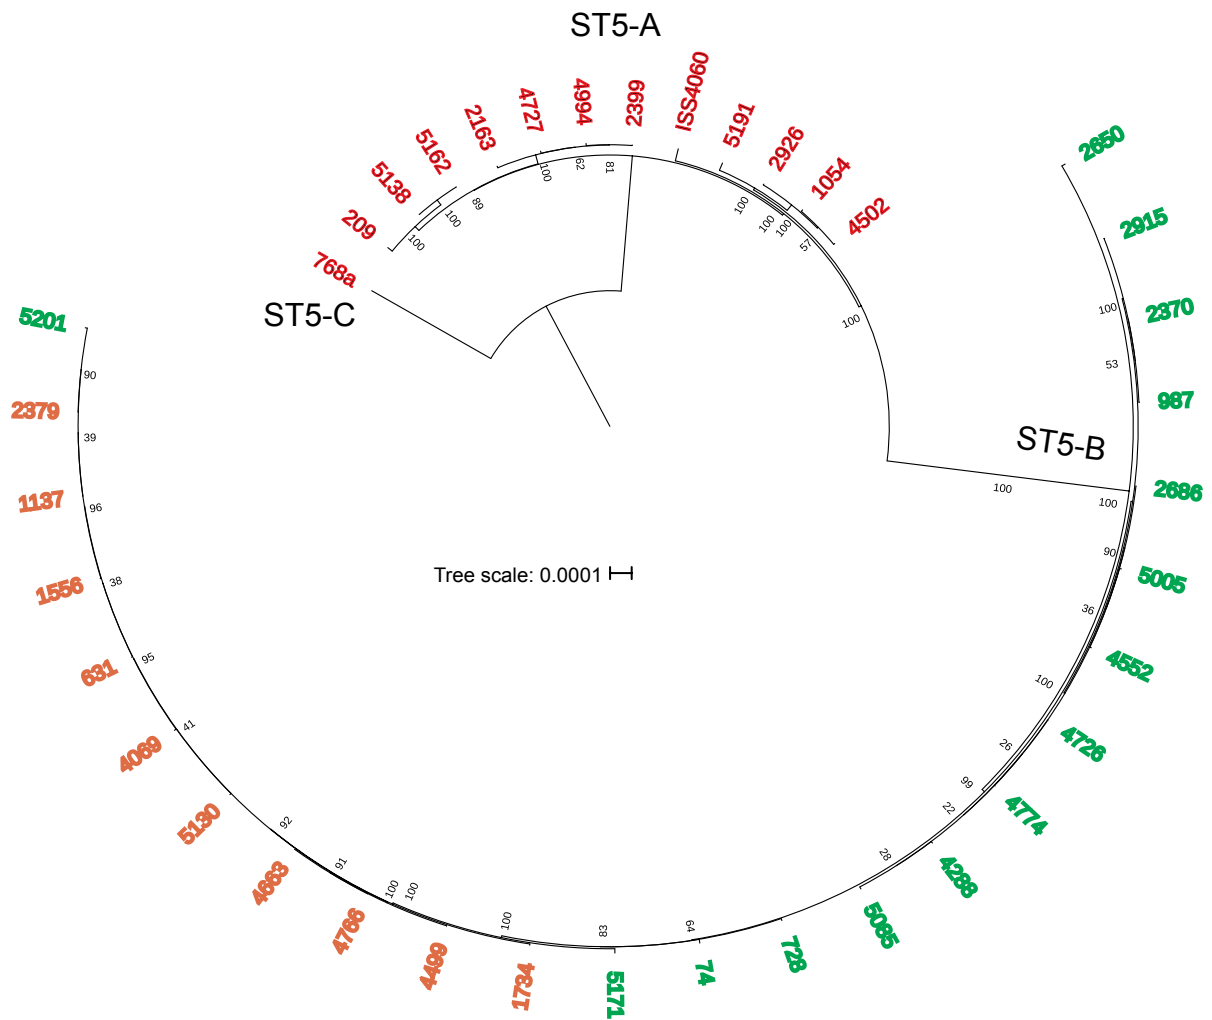

Additional File 3: Fig S1. A ML tree from core genomic alignment of ST5 strains. The strain designations of isolates of biovar *belfanti*, *gravis* and *mitis* are presented in light brown, red, and green colour, respectively.

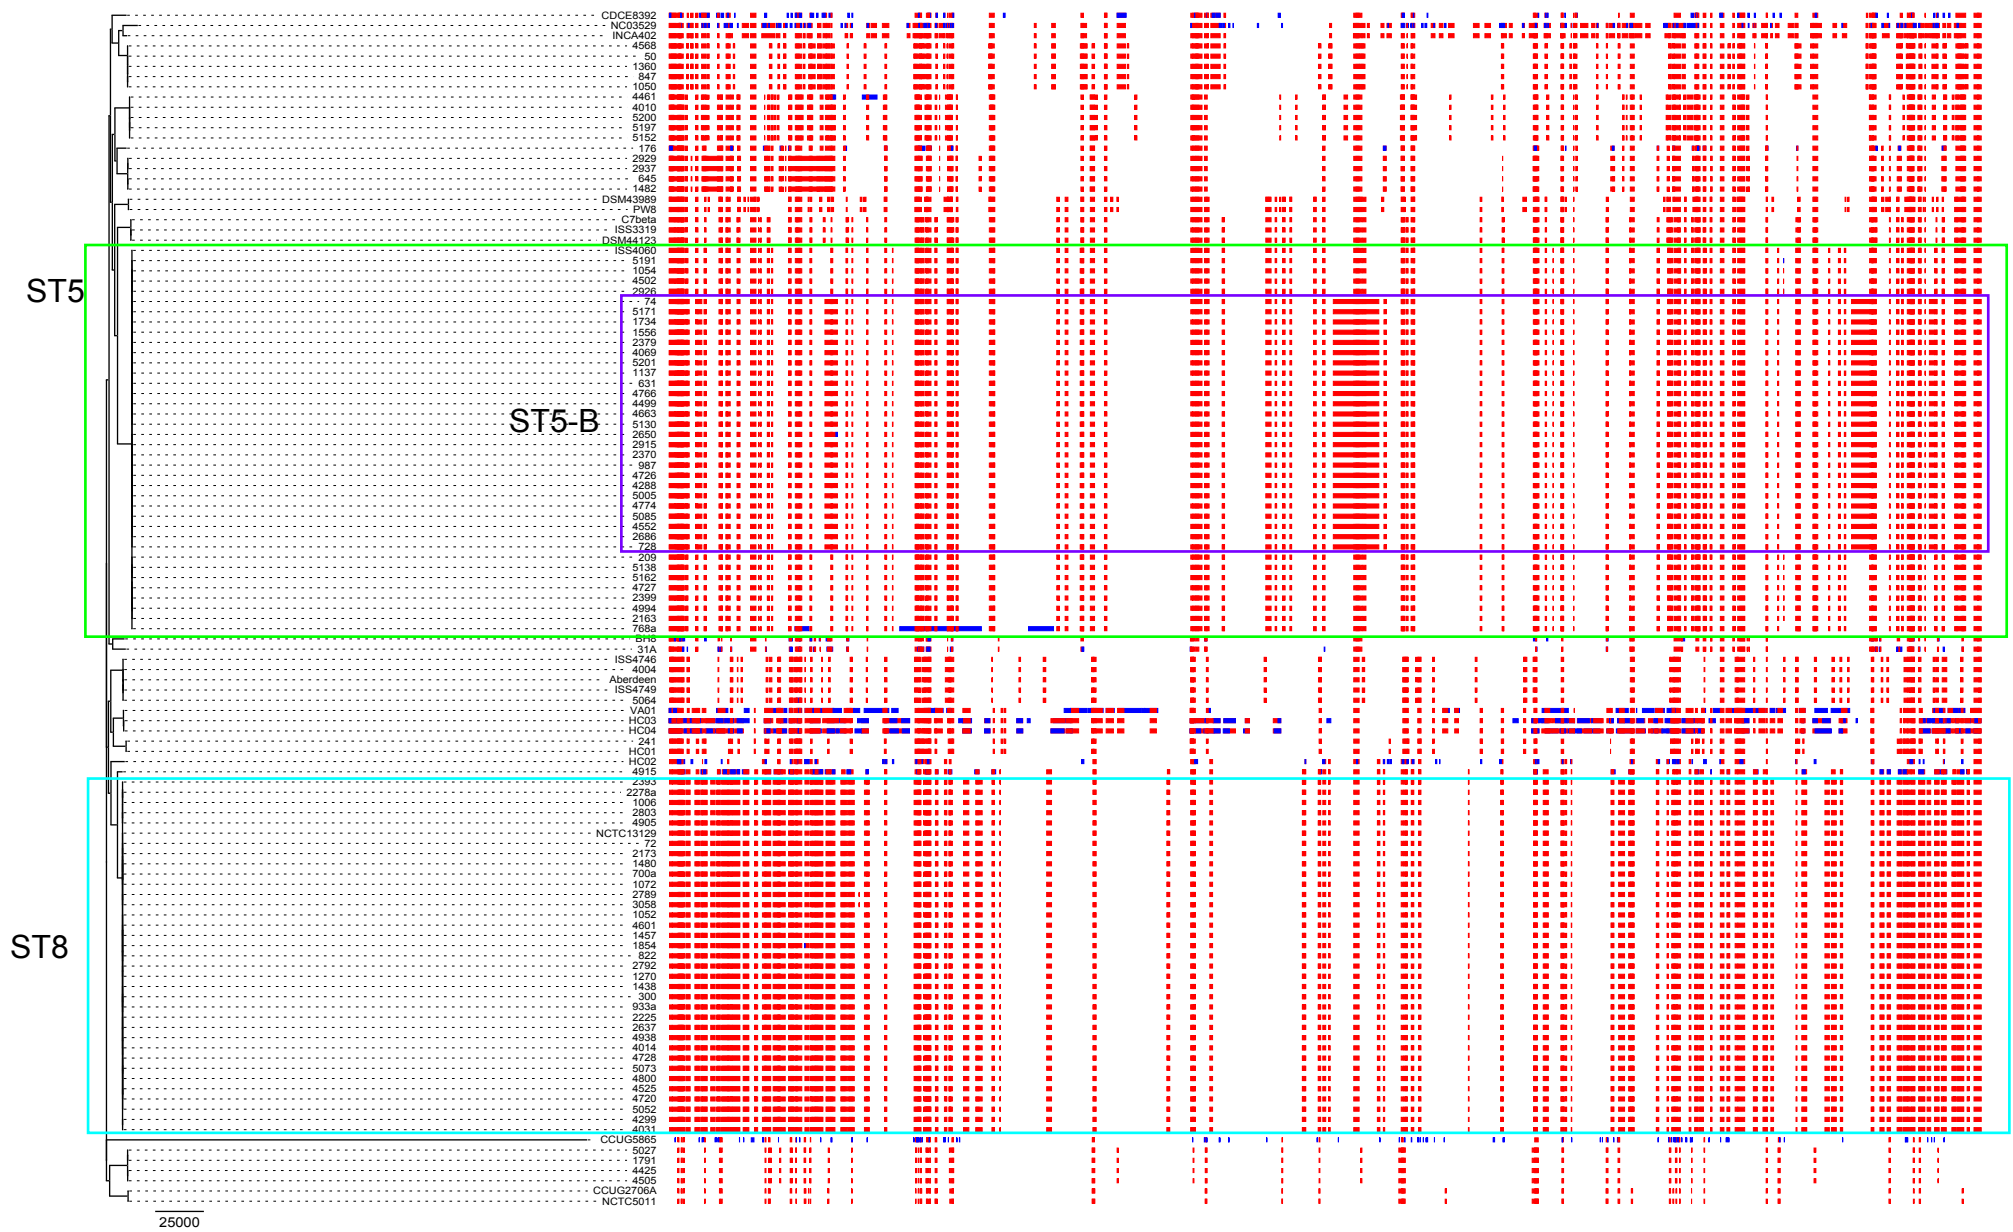

Additional File 3: Fig S2. Gubbins analysis of recombination in the core genome of *C. diphtheriae*. Predicted recombination events on internal branches are shown in red and those occurred at terminal branches are shown in blue. Isolates within ST5, subgroup ST5-B and ST8 are highlighted within green, purple and cyan rectangles.

A. ST5

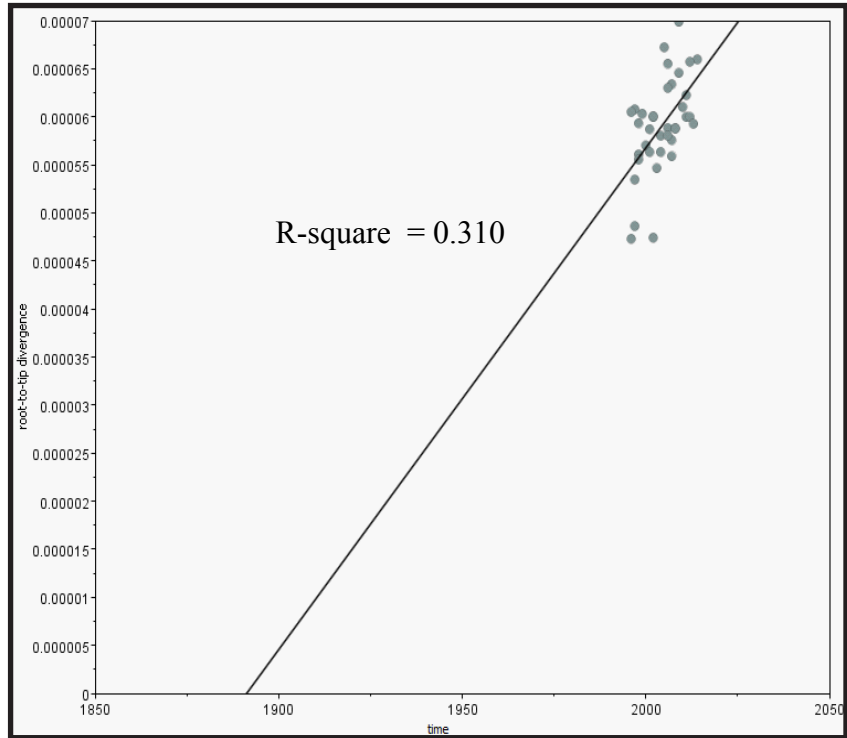

B. ST8

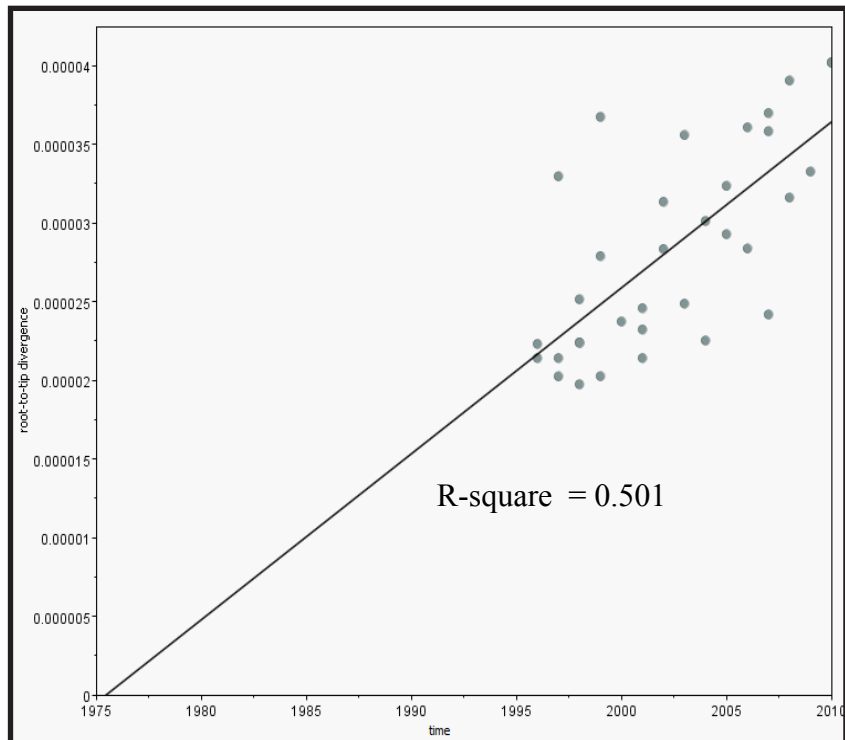

**Additional File 3: Fig S3. A** plot of root-to-tip divergence (Y-axis) against the sampling dates (X-axis); A. within ST5 and B. within ST8.

A.

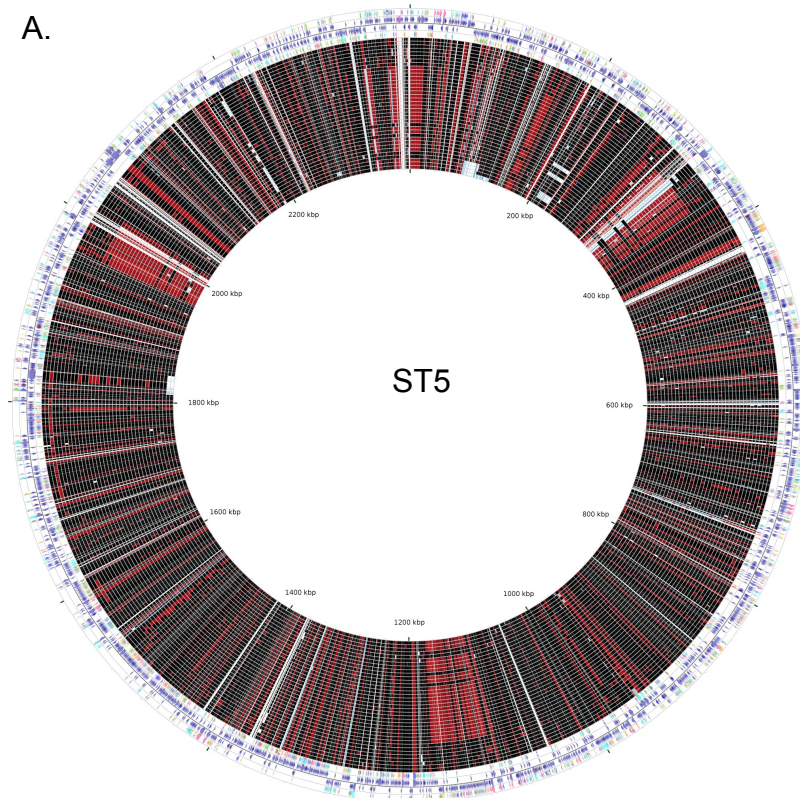

B.

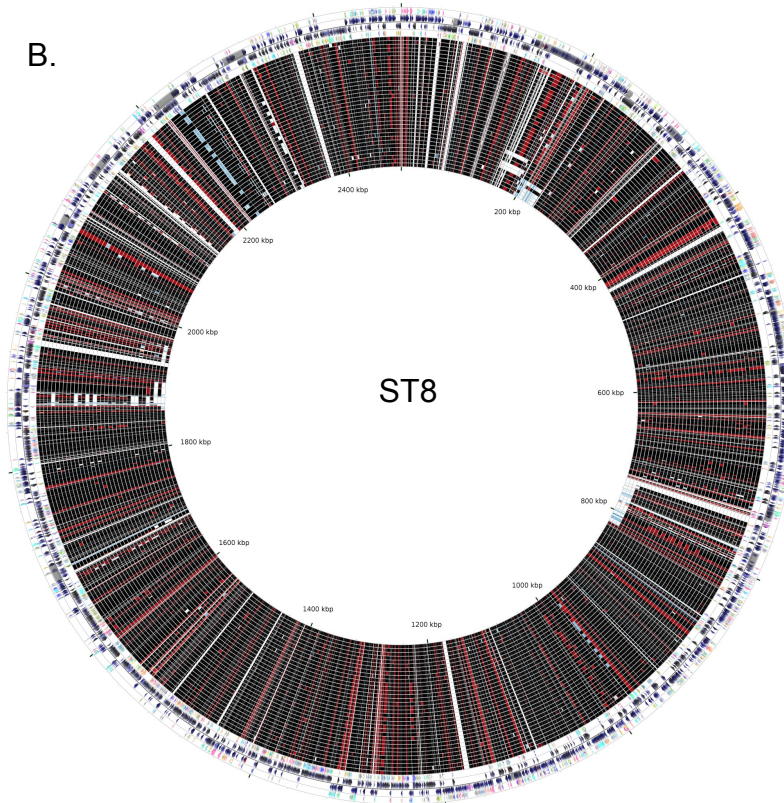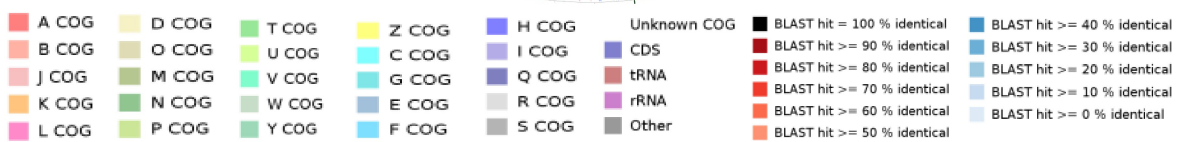

Additional File 3: Fig S4. A. CDS BLAST map of ST5 using strain ISS 4060 as the reference. B. CDS BLAST map of ST8 using strain NCTC 13129 as the reference.

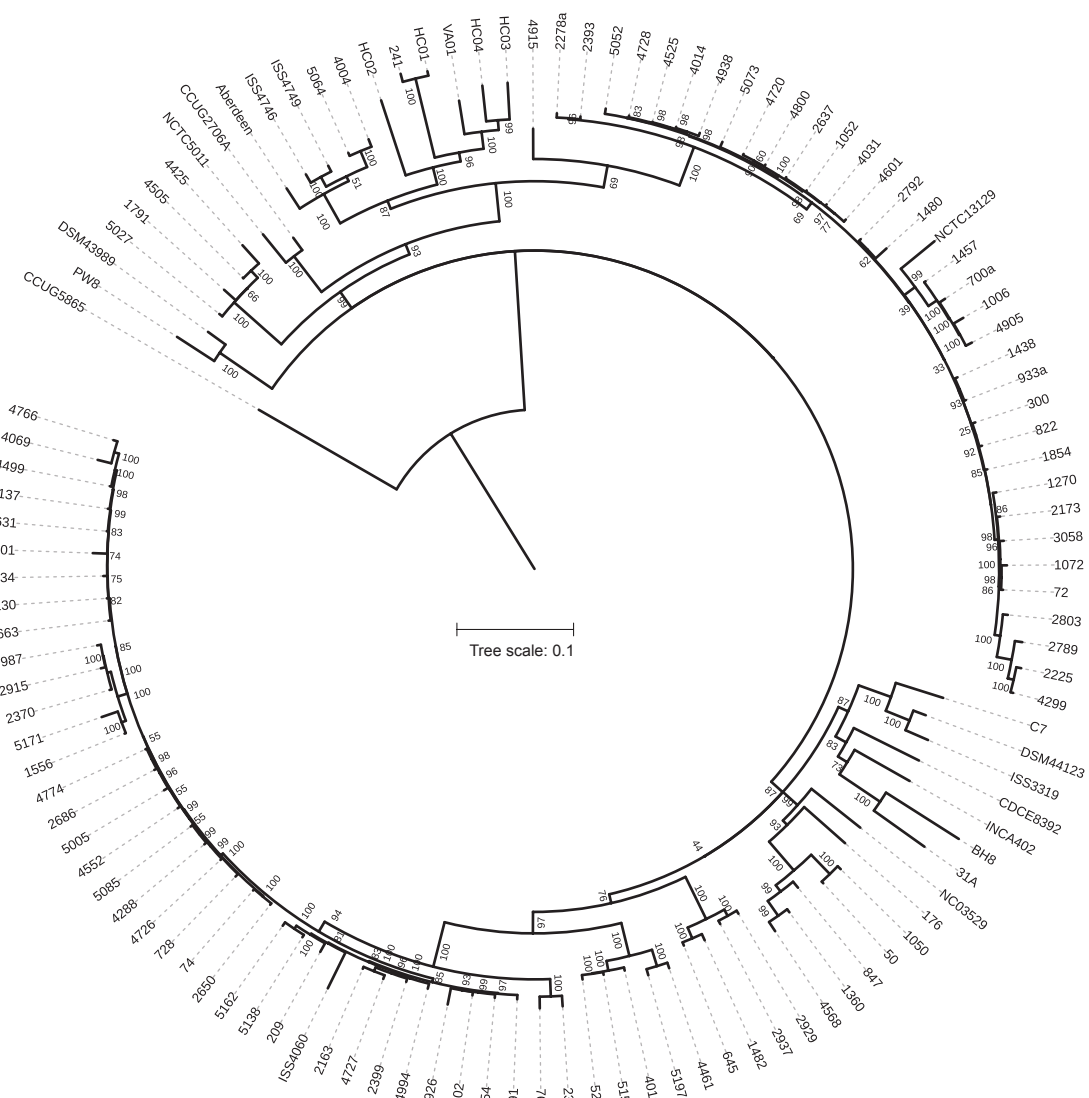

**Additional File 3: Fig S5.** A ML tree from the binary data of the presence or absence of genes in the accessory genome using GTR2+FO+ASC+R5 model according to Bayesian Information Criterion with 1,000 ultrafast bootstrap iterations and 1,000 SH-like approximate likelihood ratio test iterations. The scalebar with a distance of 0.1 represents the difference of 341.7 genes.

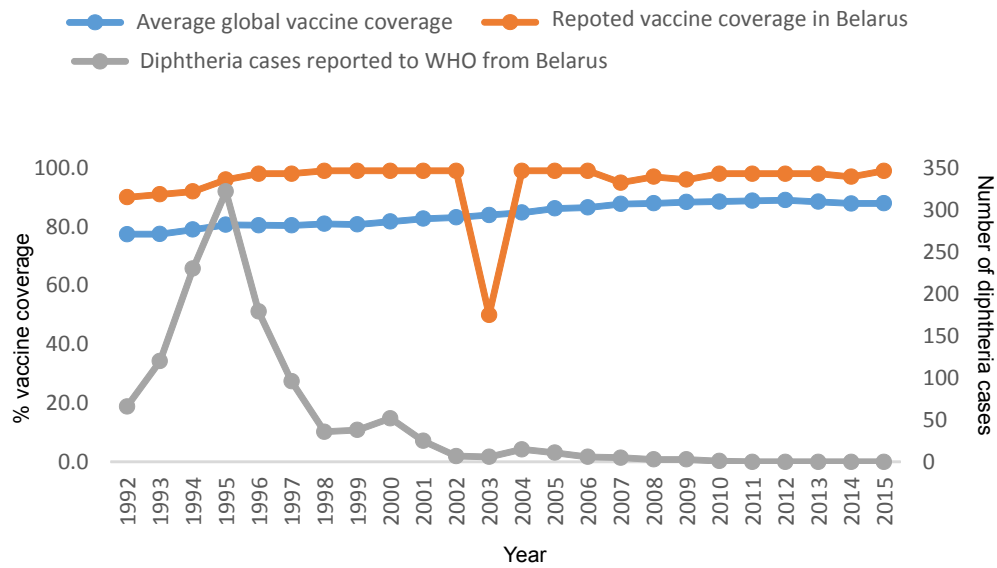

**Additional File 3: Fig S6.** A plot showing the average global vaccine coverage, reported vaccination in Belarus and the reported number of diphtheria cases between 1992 - 2015 (WHO, 2017; <http://www.who.int/topics/diphtheria/en/> and [http://www.who.int/immunization/monitoring\\_surveillance/data/en/](http://www.who.int/immunization/monitoring_surveillance/data/en/); accessed February 2017)
